# Supplementary material for: Gold Nanoparticles: Tunable Characteristics and Potential for Nasal Drug Delivery
Source: MDPI journal article supplement (doi:10.3390/pharmaceutics16050669), 2024-05-16
Supplement: s1 [file s1]

## Supporting Information for:

# Gold Nanoparticles: Tunable Characteristics and Potential for Nasal Drug Delivery

Aida Maaz<sup>1</sup>, Ian S. Blagbrough<sup>1</sup> and Paul A. De Bank<sup>1,2,3\*</sup>

<sup>1</sup> Department of Life Sciences, University of Bath, Bath BA2 7AY, UK

<sup>2</sup> Centre for Therapeutic Innovation, University of Bath, Bath BA2 7AY, UK

<sup>3</sup> Centre for Bioengineering & Biomedical Technologies, University of Bath, Bath BA2 7AY, UK

\* Correspondence: p.debank@bath.ac.uk; Tel.: +44(0)1225384017

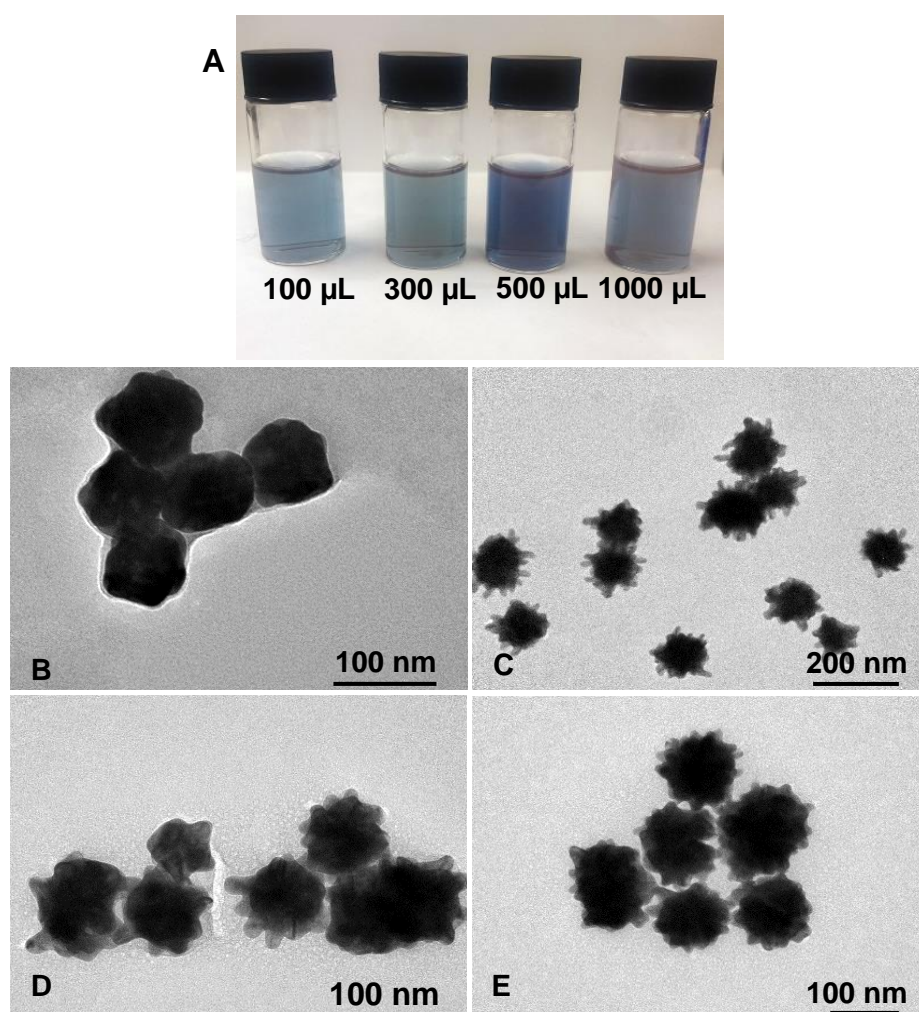

**Figure S1.** (A) Gold nanourchin suspensions generated with different volumes of 15 mM hydroquinone and (B-E) TEM images of the resulting GNUs using 100 μL (B), 300 μL (C), 500 μL (D) and 1000 μL (E) of HQ.

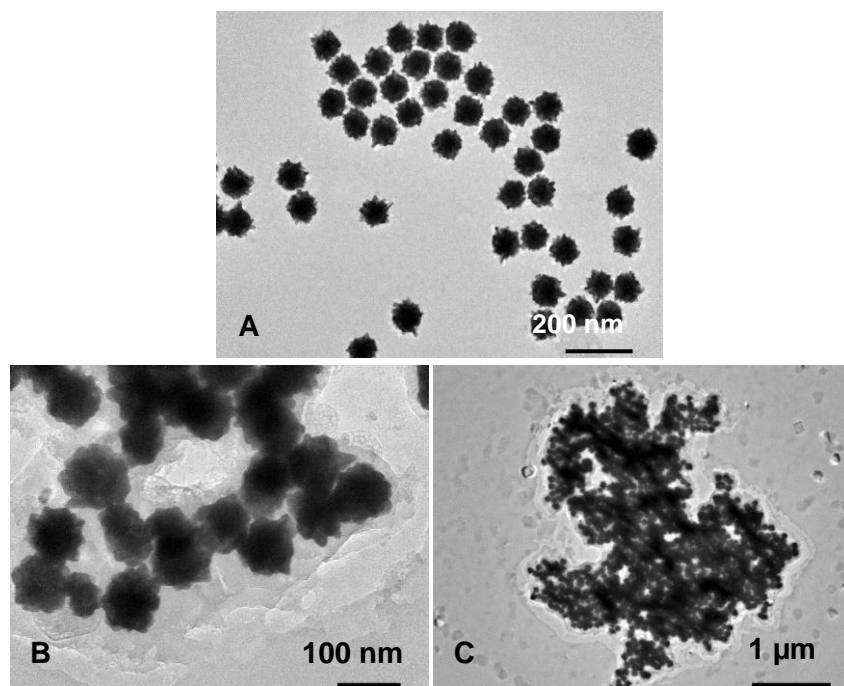

**Figure S2.** The effect of PEGylation on GNUs. TEM images of PEGylated (A) and non-PEGylated GNUs (B and C).

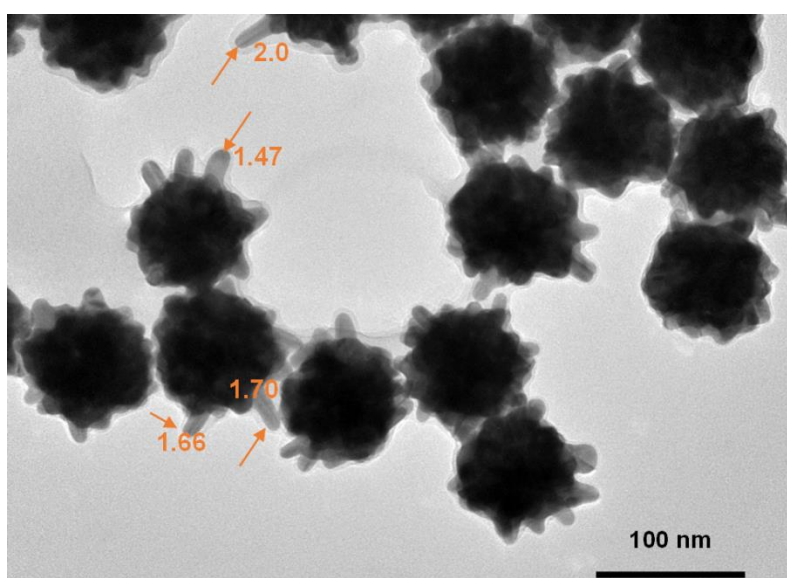

**Figure S3.** Measurement of selected spike aspect ratios on the optimized GNUs using ImageJ software.

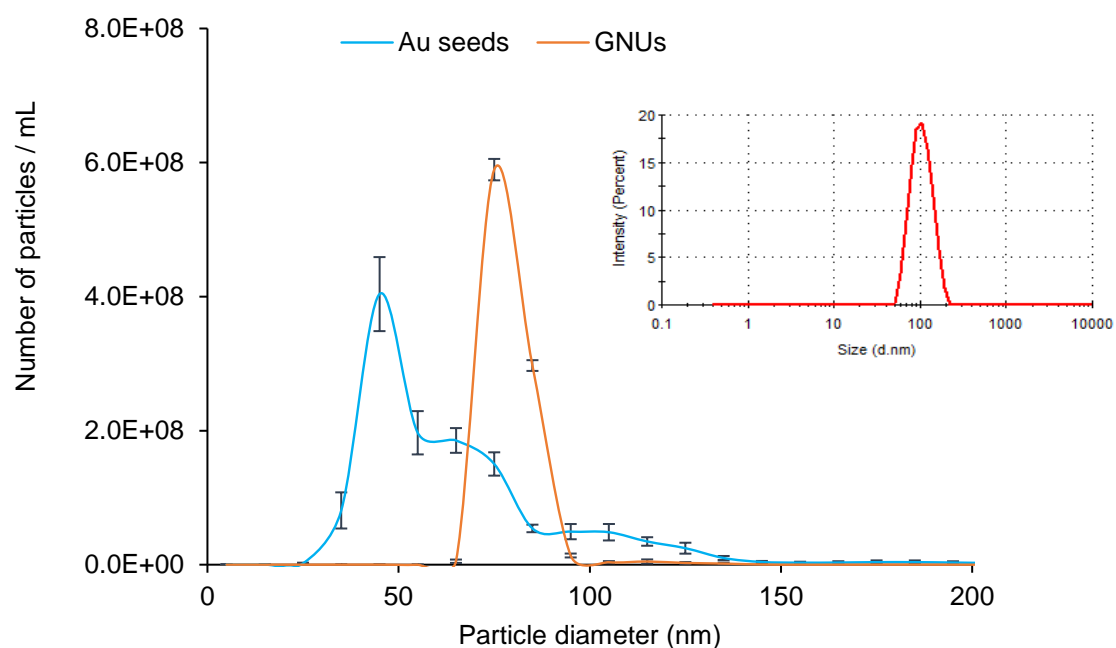

**Figure S4.** Size distribution of GNUs in comparison to the initial seeds measured with a NanoSight NS500. Inset: Histogram of GNU particle size measured by DLS.

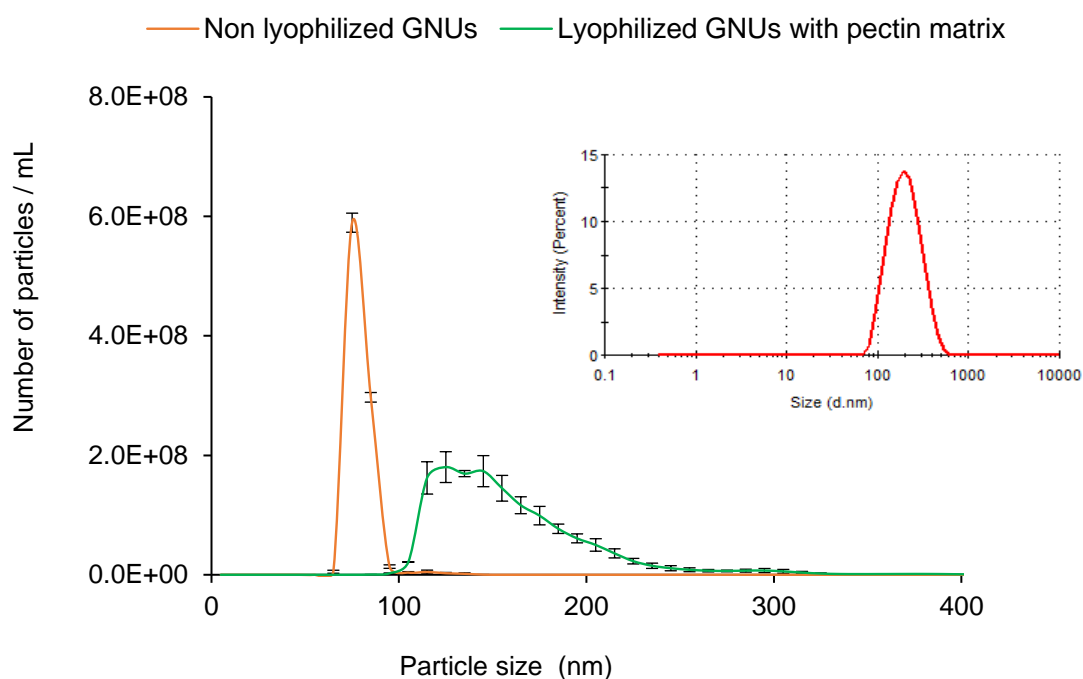

**Figure S5.** Size distribution of lyophilised pectin-based GNUs in comparison to the as-synthesised, non-lyophilised GNFs measured with the NanoSight NS500. Inset: Histogram of GNU particle size post-lyophilization measured by DLS.

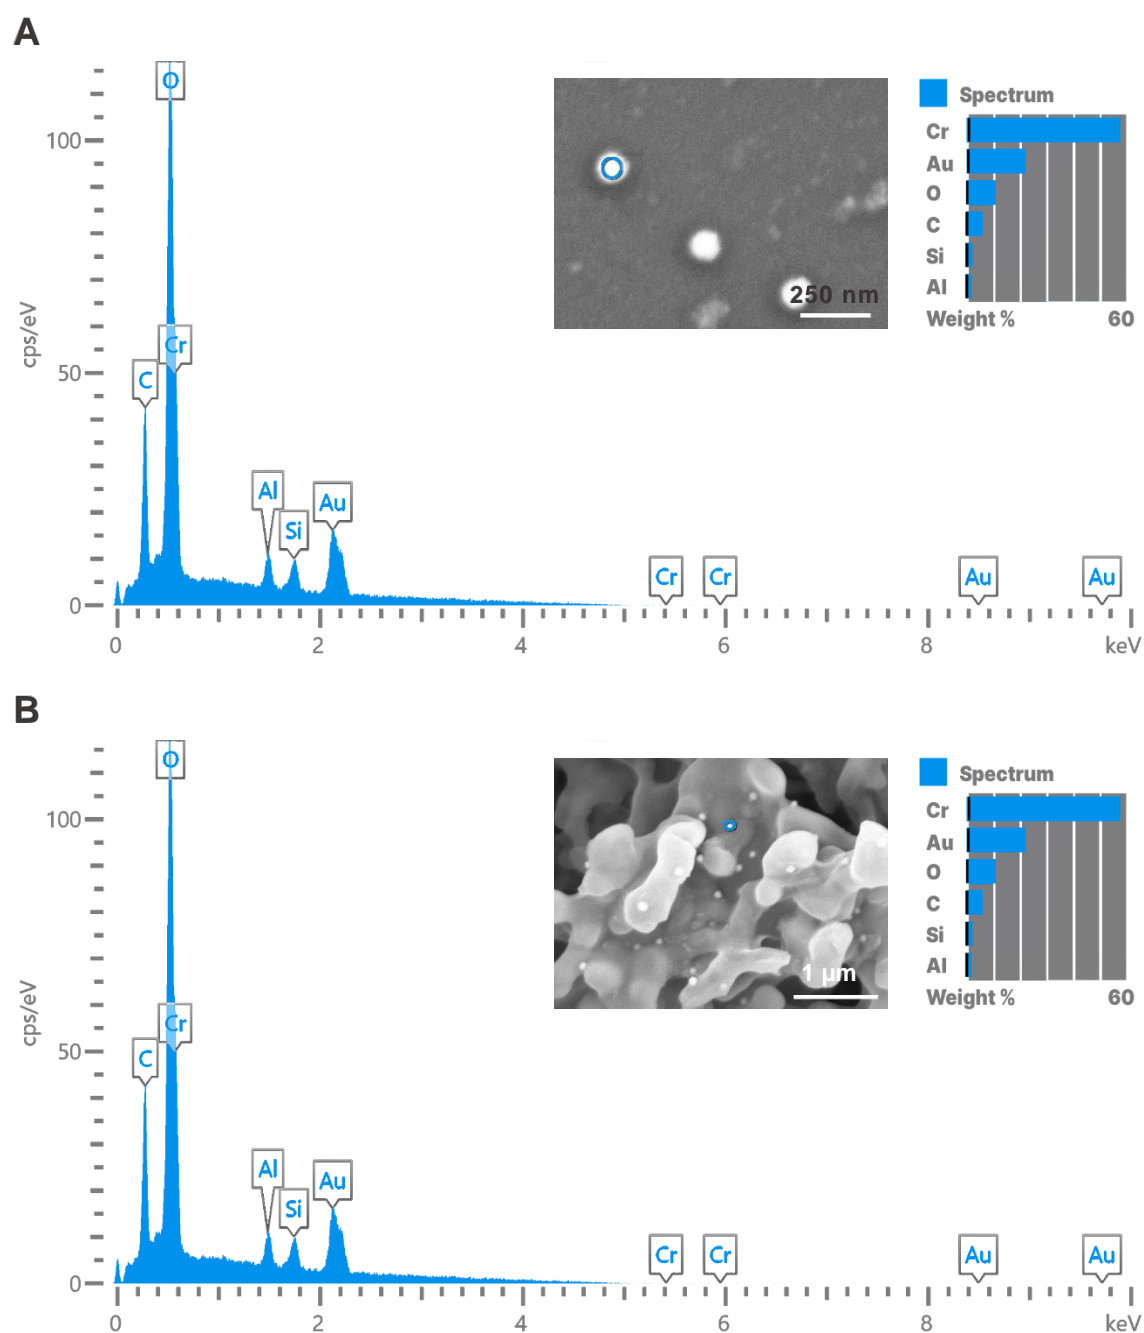

**Figure S6.** FE-SEM-EDX analysis for element composition of gold nanourchins. A) GNUs deposited on mica, and B) GNUs on a mixed cellulose ester membrane.
